# Supplementary material
Source: MDPI journal article supplement (https://www.mdpi.com/2071-1050/10/11/4145)
Supplement: s1 [file s1]

# Sustainable recovery of CO<sub>2</sub> by using a visible-light-responsive crystal cuprous oxide/reduced graphene oxide

Shou-Heng Liu <sup>1,\*</sup>, Jun-Sheng Lu <sup>1</sup> and Yi-Chiun Chen <sup>1,2</sup>

<sup>1</sup> Department of Environmental Engineering, National Cheng Kung University, Tainan 70101, Taiwan; dalelu4404@gmail.com (J.S.L); z10308032@email.ncku.edu.tw (Y.C)

<sup>2</sup> Department of Resources Engineering, National Cheng Kung University, Tainan 701, Taiwan

\* Correspondence: shliu@mail.ncku.edu.tw; Tel.: +886-6-2757575#65843

## Supplementary Material

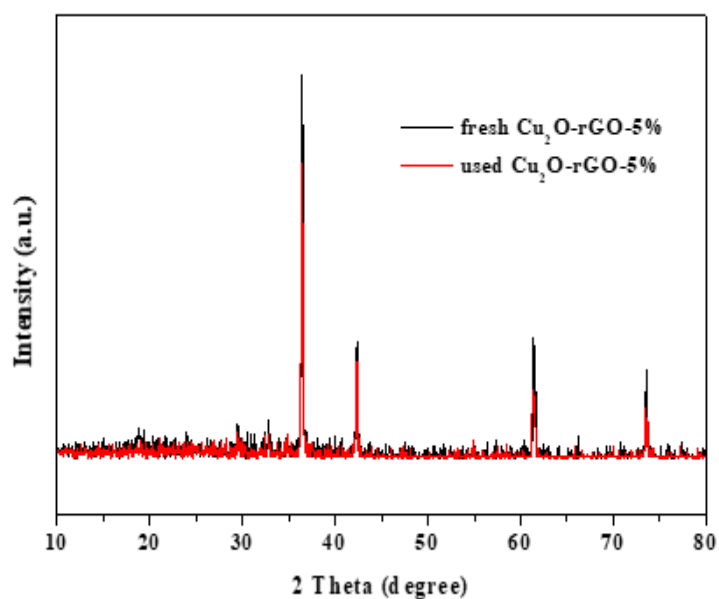

**Figure S1.** XRD patterns of the fresh and used photocatalysts after 20 h of photocatalytic reaction.
